1 **One enzyme many faces: alkaline phosphatase-based**  
2 **phosphorus-nutrient strategies and the regulatory cascade**  
3 **revealed by CRISPR/Cas9 gene knockout**

4

5 Kaidian Zhang<sup>1,4</sup>, Zhi Zhou<sup>3</sup>, Jierui Wang<sup>1</sup>, Jiashun Li<sup>1</sup>, Xin Lin<sup>1</sup>, Ling Li<sup>1</sup>, Xiaomei Wu<sup>1</sup>,  
6 Yanchun You<sup>1</sup>, and Senjie Lin<sup>1,2,4\*</sup>

7

8 <sup>1</sup>State Key Laboratory of Marine Environmental Science and  
9 College of Ocean and Earth Sciences, Xiamen University, Xiamen, Fujian, China

10

11 <sup>2</sup>Laboratory of Marine Biology and Biotechnology, Qingdao National Laboratory of  
12 Marine Science and Technology, Qingdao, China

13

14 <sup>3</sup>State Key Laboratory of Marine Resource Utilization in South China Sea, Hainan  
15 University, Haikou, Hainan, China

16

17 <sup>4</sup>Department of Marine Sciences, University of Connecticut, Groton, CT, USA

18

19 **Abstract**

20 Phosphorus (P) is an essential macronutrient for marine phytoplankton responsible  
21 for ~50% of global carbon fixation. As P availability is variable and likely will  
22 decrease in future warming oceans, phytoplankton growth will be constrained by  
23 their strategies to scavenge dissolved organophosphate. To enhance our mechanistic  
24 understanding of these strategies, here we employ CRISPR/Cas9 to create mutants of  
25 alkaline phosphatase (AP) PhoA and PhoD and a putative regulator in the diatom  
26 model *Phaeodactylum tricornutum*, coupled with transcriptomic profiling to  
27 interrogate their modes of function and P- regulatory network. Results indicate that  
28 these two AP isoforms are differentiated in subcellular localization and substrate  
29 specialization, and are mutually compensatory and replaceable. Further analyses

30 reveal a regulatory cascade of P scavenging and potential roles of AP in iron and  
31 ammonium uptake as well as diverse metabolic pathways. These findings have  
32 important implications in how phytoplankton community will respond to future  
33 changing microenvironments of global oceans.

34

## 35 **Introduction**

36 Like land plants, marine phytoplankton contribute ~50% of global carbon fixation  
37 from carbon dioxide that provides organic carbon and oxygen to the worldwide biota  
38 (1). The growth and productivity of both land plants and phytoplankton rely on  
39 phosphorus (P) and other nutrients (2). However, in various parts of the world's  
40 oceans, P-nutrient, primarily dissolved inorganic phosphorus (DIP), is limited (3-5).  
41 To maintain intracellular P homeostasis and population growth, phytoplankton have  
42 evolved strategies to utilize the more abundant dissolved organic phosphorus (DOP)  
43 as an alternative source of P (6). They mainly achieve this via alkaline phosphatase  
44 (AP) that hydrolyses phosphomonoesters, which account for ~75% of total DOP in  
45 the ocean, and other enzyme systems that hydrolyse phosphonates, which account  
46 for ~25% of total DOP (5, 7). These environmental characteristics, along with the  
47 short generation times of phytoplankton (unicells), present an excellent model to  
48 elucidate how AP confers photosynthetic organisms the ability to utilize the highly  
49 diverse organophosphate compounds and maintain population growth in P-poor  
50 environments.

51

52 Diatoms are one of the most dominant primary producers in the global ocean,  
53 contributing about 40% of marine primary production. The rapidly growing genomic  
54 studies on marine phytoplankton have resulted in the emergence of two diatom  
55 model species, *Phaeodactylum tricorutum* and *Thalassiosira pseudonana*, which  
56 received enormous research attention. However, how phytoplankton in general or  
57 diatoms in particular regulate the expression and function of AP for scavenging  
58 different sources of P, maintaining P homeostasis and responding to low-P stress is  
59 poorly understood. Here, we use *Phaeodactylum tricorutum* as a model and employ  
60 CRISPR/Cas9 to knock out two AP genes (*PhoA* and *PhoD*) and the gene of SPX protein,

61 a P regulator previously known only in plants (8), and perform transcriptome  
62 profiling to characterize their modes of functions. The results unveil striking  
63 functional differentiation, compensatory expression, and replaceable regulation of  
64 the different isoforms of AP, and the SPX-PHR-PSI regulatory cascade of P-nutrition  
65 and homeostasis. Besides these novel insights, our network-based functional  
66 interrogation shed light on potential functional interactions of P and AP with uptake  
67 of iron and nitrogen as well as various metabolic pathways. These findings have  
68 significant ecological implications regarding how phytoplankton taxa may  
69 differentially respond to and compete for the potentially increasingly limited P in  
70 future oceans.

71

## 72 **Methods**

### 73 **Algal culture**

74 *Phaeodactylum tricornutum* strain CCAP 1055/1 was obtained from the Culture  
75 Collection of Algae and Protozoa (Scottish Marine Institute, UK;  
76 <https://www.ccap.ac.uk/>). Cells were cultured in autoclaved 0.22- $\mu\text{m}$  filtered oceanic  
77 seawater collected offshore in the South China Sea, enriched with the full nutrient  
78 regime of the f/2 medium without additional silicic acid. The cultures were made  
79 axenic by treatment with  $1 \times$  KAS compound antibiotics ( $50 \mu\text{g ml}^{-1}$  kanamycin,  $100$   
80  $\mu\text{g ml}^{-1}$  ampicillin and  $50 \mu\text{g ml}^{-1}$  streptomycin). Cultures were incubated at  $20^\circ\text{C}$   
81 under a 14:10 light dark cycle with a photon flux of  $100 \mu\text{E m}^{-2} \text{S}^{-1}$ .

82

### 83 **PAM-target site selection and vector construction**

84 The PhytoCRISP-Ex, a CRISPR target finding tool, was used to design Cas9 target sites  
85 (G-N19-NGG) with low/no off-target potential (9) (Table S1). The single guide RNA  
86 (sgRNA) adapters targeting PhoA, PhoD and SPX were individually ligated into  
87 separate pKS\_diaCas9\_sgRNA plasmids (Addgene ID: 74923) as described in Nymark  
88 *et al.* (10). The recombined pKS\_diaCas9\_sgRNA plasmids were co-introduced with  
89 pAF6 plasmid carrying Zeocin resistance gene (Invitrogen, Thermo Fisher Scientific,  
90 Grand Island, New York, USA), with the former to induce mutation and the latter to  
91 facilitate selection (11).

92

### 93 **Biolistic transformation**

94 For co-transformation with the dual plasmids, cells were collected from exponentially  
95 growing cultures and were then concentrated to  $2 \times 10^8$  cells ml<sup>-1</sup> at 3000 g for 5 min.  
96 Then 200 µl of the cell suspension was spread on 1.5% agar plates containing 50%  
97 seawater supplemented with f/2 medium nutrients without silica. Transformation  
98 was performed using a Bio-Rad Biolistic PDS-1000/He Particle Delivery System (Bio-  
99 Rad, Hercules, California, USA) as described previously (12). A burst pressure of 1550  
100 psi and a vacuum of 28 Hg were used. Three mg of assembled pKS\_diaCas9\_sgRNA  
101 plasmid and 3 mg of the pAF6 selection plasmid were used for co-transformation. The  
102 bombarded cells were incubated on the agar plate under low light (50 µmol photons  
103 m<sup>-2</sup>s<sup>-1</sup>) at 20°C. Two days after the transformation, cells were re-suspended in 600  
104 µL sterile 50% seawater. About 200 µl of this suspension was plated onto agar  
105 medium containing 50 µg ml<sup>-1</sup> Zeocin and 1 × KAS compound antibiotics, and the plate  
106 was incubated under a 14:10 light dark cycle at a photon flux of 100 µmol photons  
107 m<sup>-2</sup> s<sup>-1</sup> at 20°C. After three weeks, the colonies growing on the plate were re-steaked  
108 on fresh 9 cm 1% agar plates containing 75 µg ml<sup>-1</sup> Zeocin to isolate pure mutant  
109 strains.

110

### 111 **DNA isolation and genotype characterization**

112 Pure colonies from above were transferred to 24-well plates (Bio-Rad), and cells were  
113 incubated for 10 days. To lyse the cells, 100 µl of transformed cells were removed to  
114 PCR tubes. Tubes were centrifuged for 2 min and then re-suspended in 50 µl TE buffer  
115 (10 mM, pH 8.0). The resuspended cells were frozen in liquid nitrogen, then heated  
116 immediately in 98°C for 10 min using PCR Thermal Cycler (Bio-Rad). The freezing-  
117 heating cycle was repeated for 3 times. After a brief centrifugation to pellet cell debris,  
118 the supernatant for each clone was used directly or stocked at 4°C. Three microliters  
119 of cell lysates were used as template for PCR analysis using ExTaq DNA polymerase  
120 (Takara, Mountain View, California, USA). For checking the presence or absence of  
121 Cas9 gene components in the genome, primer pairs were designed in the 3' region for  
122 PCR amplifying the sequences (Table S2). To confirm the disruption (insertions and



123 deletions) of the target genes, the target regions were amplified using specific  
124 primers designed flanking the targets (Table S2). The PCR products were separated  
125 by electrophoresis on a 1% agarose gel, purified using MiniBEST Agarose Gel DNA  
126 Extraction Kit (Takara), and cloned into pMD19-T (Takara). Random clones were  
127 picked for Sanger sequencing.

128

### 129 **Comparison of growth between wild type and mutants**

130 The mutant and wild type (WT) cells were first cultured in f/2 medium until they  
131 reached the exponential growth phase. Then, the cultures were inoculated into low-  
132 Pi (5  $\mu\text{M}$ ) f/2 medium and grown until phosphate in the culture was all depleted (<  
133 0.5  $\mu\text{M}$ ). The P-limited mutant cells and WT cells were finally inoculated separately  
134 into media with different phosphorous nutrient conditions: P+ (36  $\mu\text{M}$  DIP), phytate  
135 (PA) (36  $\mu\text{M}$ ), glycerol-3-phosphate (G3P) (36  $\mu\text{M}$ ), triethyl phosphate (TEP) (36  $\mu\text{M}$ )  
136 and P- (DIP < 0.5  $\mu\text{M}$ ), each in triplicate. These DOP compounds were all provided by  
137 Sigma-Aldrich (St. Louis, Missouri, USA). In each culture, 1  $\times$  KAS compound  
138 antibiotics were added to avoid bacterial interference. Cell concentration was  
139 determined daily using CytoFLEX flow cytometer (Beckman Coulter, Indianapolis,  
140 Indiana, USA), which measures chlorophyll fluorescence with the excitation light of  
141 488 nm and emission at 690 nm. Around  $2 \times 10^7$  cells from each culture were  
142 collected every other day by centrifugation at 3000 g, 4°C for 5 min and re-suspended  
143 in 1 ml Trizol Reagent (Thermo Fisher Scientific) and stored at -80°C for subsequent  
144 RNA extraction. The supernatant recovered was used to measure DIP concentration  
145 with the molybdenum blue method (13).

146

### 147 **The measurement of alkaline phosphatase activity**

148 AP activity was determined by adding 50  $\mu\text{l}$  of 20 mM p-nitro-phenylphosphate (p-  
149 NPP from Fluka; dissolved in 1 M Tris buffer at pH 8.5) into 1 ml culture sample to  
150 yield final concentrations of 1 mM p-NPP and 50 mM Tris at pH 8.5 (14). Each reaction  
151 was carried out in a sterile 1.5 ml tube in the dark at 20°C for 2 h. The samples were  
152 then centrifuged at 12000 g for 1 min. The supernatant was used for total AP activity  
153 measurement at 405 nm on a SpectraMax Paradigm plate reader (Molecular Devices,

154 San Jose, California, USA). For the measurement of extracellular AP activity, the  
155 culture was filtered through a 0.22- $\mu$ m membrane and the filtrate was used to detect  
156 AP activity using the same spectrophotometric method as described above.

157

### 158 **RNA extraction, cDNA synthesis and gene expression measurement**

159 Total RNA was extracted using Trizol Reagent coupled with Qiagen RNeasy Mini kit  
160 (Qiagen, Germantown, Maryland, USA) following a previously reported protocol (15).  
161 The RNA extracts were treated with RQ1 DNase (Promega, Madison, Wisconsin, USA)  
162 to remove any genomic DNA contamination. RNA concentrations were measured  
163 using NanoDrop ND-2000 Spectrophotometer. For each sample, 200 ng of total RNA  
164 was reverse-transcribed in a 20  $\mu$ l reaction mixture using the ImProm-II reverse  
165 transcriptase (Promega) with random hexamer primer according to the  
166 manufacturer's instructions. Each cDNA preparation was diluted 1: 20 with nuclease-  
167 free water for further analysis. To assess the differential expression of each target  
168 gene under different conditions, RT-qPCR analyses were conducted using specific  
169 primers designed for each target gene (Table S3). RT-qPCR was performed with a  
170 CFX96 Touch Real-Time PCR detection system (Bio-Rad) with iQ™ SYBR Green  
171 Supermix (Bio-Rad) following the manufacturer's recommendations. Three replicate  
172 assays were performed for each RNA sample.

173

### 174 **Phylogenetic Analysis of AP, PT and SPX genes in *P. tricornutum***

175 To understand the types of APs, PTs, and SPX domain-containing protein genes  
176 identified, the phylogenetic trees were inferred for each gene based on the amino acid  
177 sequences of the gene of interest and sequences of previously reported known types  
178 of the gene obtained from NCBI NR database. The amino acid sequences were aligned  
179 using MUSCLE (16) embedded in the software MEGA X (17), and edited manually  
180 using MEGA X. Phylogenetic tree reconstructions were performed employing the  
181 PhyML-aLRT method (18) with LG, WAG+G+F and LG+G models for AP, PT and SPX  
182 respectively and best of NNI & SPR on the Seaview platform (19).

183

## 184 **Construction and deep sequencing of transcriptome libraries**

185 Samples were collected on the third day from mutant and WT cultures, triplicated for  
186 each cell type and growth condition, including Wild Type (WT), mutants of PhoA  
187 (*mPhoA*), PhoD (*mPhoD*), and SPX (*mSPX*), each under P-replete (P+), P-depleted (P-)  
188 conditions, and glycerol-3-phosphate (G3P), totaling 36 samples. RNA was extracted  
189 for each sample and was measured using NanoDrop ND-2000 Spectrophotometer as  
190 described above, and RNA integrity was verified with Agilent 2100 Bioanalyzer  
191 (Agilent Technologies). Thirty-six single-end fragment libraries (50 bp) were  
192 constructed and sequenced on the BGISEQ-500 platform according to the  
193 manufacturer's instructions (BGI). Sequencing reads were processed by trimming off  
194 adaptors and primers and removing low-quality reads. The good-quality reads  
195 retained were mapped to the annotated genome of *P. tricornutum* strain CCAP  
196 1055/1 to identify genes, quantify expression levels, and analyze coordinated  
197 expression networks (see below).

198

## 199 **Weighted gene co-expression network analysis**

200 The genomic sequences and genome annotation of *P. tricornutum* strain CCAP 1055/1  
201 were downloaded from Ensembl Genomes archive  
202 sites (<http://ensemblgenomes.org/>). The alignment of our transcriptome reads to  
203 the genome was performed using the HISAT2 software (20). StringTie and DESeq2  
204 software were used to estimate transcript abundances and identify differentially  
205 expressed genes among different groups (FDR < 0.05, fold change > 2), respectively  
206 (21). Based on the mRNA expression level of all genes in transcriptome libraries and  
207 alkaline activities of each culture, the WGCNA package was employed to construct  
208 global weighted correlation network (22). The network was further analyzed and  
209 displayed using the Cytoscape software (23).

210

## 211 **Results**

### 212 **Gene knockout reveals differential subcellular distributions of APs**

213 We identified eight AP genes from our *P. tricornutum* transcriptomes (SRP214503),  
214 including the previously reported *PhoA* (Phatr3\_J49678), five putative *PhoD*, one

215 *PhoA<sup>aty</sup>* and one unclassified AP gene (Fig. S1 and Table S4). Most of these genes were  
216 significantly up-regulated under P-stress (P<sup>-</sup>) (Table S4). *PhoA* and the most P-  
217 responsive *PhoD* (Phatr3\_J45757) were selected for knockout. We designed multiple  
218 single-stranded (sg)RNA sequences for each based on available protospacer adjacent  
219 motif (PAM) sites and transformed *P. tricornutum* cells with dual plasmids carrying  
220 sgRNA-Cas9 and zeocin resistance, respectively (Fig. S2 and Table S5). Both  
221 insertions and deletions (indels) occurred at the target site in each gene (Fig. S2).

222

223 Knockout mutants *mPhoA21* and *mPhoD30* were selected for investigating the  
224 differentiation of subcellular functional locality of PhoA and PhoD. In the P<sup>-</sup> culture,  
225 extracellular AP activity and total AP activity in *mPhoA* decreased by 95% and 76%,  
226 respectively (Fig. S3), indicating that PhoA is an extracellular enzyme. When averaged  
227 over a 10 day experimental period, PhoA accounted for ~75% of total AP activity (Fig.  
228 S4). By contrast, *PhoD* mutation caused no remarkable changes in either extracellular  
229 AP or total AP under P<sup>-</sup> conditions (Fig. S3). Thus, PhoD is an intracellular AP and  
230 only contributes a minor fraction (<25%) of total AP.

231

### 232 **Differential functions of APs and switchable pathways of DOP utilization**

233 To further examine the functional relationship between PhoA and PhoD, three  
234 different DOP compounds, phytate, glycerol-3-phosphate (G3P), and triethyl  
235 phosphate (TEP), were supplied as the sole P source. Mutants and wild-type (WT)  
236 diatoms were grown with one of the three DOPs or DIP (P<sup>+</sup>), or without P (P<sup>-</sup>).

237

238 Without PhoA, *P. tricornutum* utilized phytate or DIP as the sole P source efficiently,  
239 but without PhoD, much less growth occurred (Fig. 1a-d and Fig. S5). Because we  
240 found no DIP released into the medium (Fig. 1b), apparently, phytate was not  
241 hydrolysed extracellularly, but was transported into the cells for use, where PhoD  
242 would play a major role (Fig. 1e). Its import might cost energy, explaining the  
243 observed <100% growth efficiency. With TEP as the sole P source, we observed  
244 neither growth nor DIP release in the WT or mutant cultures (Fig. 1a, b, d), indicating  
245 *P. tricornutum* is unable to utilize TEP (Fig. 1e). By contrast, WT with G3P cultures

246 displayed growth comparable to those of WT with DIP (Fig. 1a, d), indicating that *P.*  
247 *tricornutum* utilizes G3P at 100% efficiency. Meanwhile, a significant amount of DIP  
248 was released into the medium, while none was detected in the *mPhoA* group cultured  
249 with G3P (Fig. 1c). Therefore, G3P utilization involves extracellular hydrolysis by  
250 PhoA. Taken together, PhoA and PhoD are specialized for different DOP substrate  
251 types (Fig. 1e).

252

253 Surprisingly, given the reliance of G3P utilization on PhoA, *PhoA* mutation did not  
254 inhibit *P. tricornutum* growth in the G3P medium, but allowed similar growth to that  
255 of *mPhoA* with DIP (Fig. 1a, d). This indicates that *P. tricornutum* can switch to a  
256 different mechanism when PhoA function is lost. This mechanism was unlikely to be  
257 another extracellular hydrolase because no DIP release was detected; therefore, it  
258 likely involved importing G3P into the cell and hydrolyzing it via PhoD or other  
259 intracellular APs (Fig. 1e).

260

### 261 **Compensatory regulation among AP genes observed from AP mutants**

262 RNA-seq showed that *PhoA* mutation induced up to threefold up-regulation of two  
263 PhoD genes and two other putative AP genes under G3P conditions (Fig. 1f and Table  
264 S6), a result verified by RT-qPCR (Fig. 1g). Similarly, in *mPhoD*, other AP genes were  
265 significantly up-regulated (up to threefold,  $p < 0.05$ ) under P+ or P- conditions, as both  
266 RNA-seq and RT-qPCR results showed (Fig. 1h, i and Table S7). Both cases indicate a  
267 remarkable mutually compensatory up-regulation between *PhoA* and *PhoD* when one  
268 of them is functionally lost.

269

### 270 **SPX mutation uncovers a regulatory cascade of AP and P transporter genes**

271 We identified six genes harboring an SPX domain, which is known as a sensor of  
272 intracellular P level and regulator of P homeostasis in land plants (8) but has not been  
273 studied in algae; of these, *Phatr3\_J47434* only contains the SPX domain (SPX protein)  
274 and is expected to exclusively regulate P uptake and homeostasis, while others  
275 contain additional domains (SPX-like protein) and may regulate a variety of  
276 physiologies (8, 24). Our results showed that the SPX and two of the SPX-like genes

277 were inducible by P stress (Fig. S6 and Table S8). We chose to study the SPX gene, and  
278 obtained multiple mutants (*mSPX*) with various indels (Fig. S2). *SPX* disruption led to  
279 significant increases in AP activities (Fig. 2a, b) and gene expression (Fig. 2c and Table  
280 S9) under both P+ and P- conditions. This is reflected in both RNA-seq and RT-qPCR  
281 results, with RT-qPCR indicating 3.3–22.4-fold up-regulation for three AP genes in  
282 *mSPX*/P+ cultures and 1.4–2.2-fold up-regulation for four AP genes in *mSPX*/P-  
283 cultures (Fig. 2d). This is clear evidence that SPX is an upstream negative regulator  
284 of AP genes.

285

286 Furthermore, our results showed that SPX is also a regulator of P transport. We  
287 identified 13 phosphate transporter (PT) genes from our transcriptomes, including  
288 seven encoding sodium-dependent phosphate transporters (SPT) and six major  
289 facilitator superfamily inorganic phosphate transporters (IPT). Under P- conditions,  
290 six of the SPT genes showed significant up-regulation, while only one showed no  
291 change; by contrast, only one *IPT* showed significant up-regulation (Table S10). *SPX*  
292 mutation led to significant up-regulation of most of these P-responsive transporter  
293 genes regardless of P conditions, as shown by both transcriptomic (Fig. 2c and Table  
294 S11) and RT-qPCR data (Fig. 2e). Our phylogenetic analysis confirms that the non-P-  
295 responsive transporters (exclusively IPT) are low-affinity transporters functioning  
296 under P-rich conditions, while those promoted by P stress and SPX mutation (mostly  
297 SPT) are high-affinity transporters (Fig. S7).

298

299 Surprisingly, *SPX* in WT was also up-regulated under P stress (Table S8): unexpected  
300 for a negative regulator of AP and PT genes. This suggests that AP and PT are not  
301 immediate targets of SPX; rather, an intermediate control mechanism may exist  
302 between SPX and AP or PT (Fig. 2f). We identified seven genes encoding P starvation  
303 response protein (PHR) (25) that were inducible by P stress, one of which  
304 (*Phatr3\_J47256*) showed ~20-fold up-regulation (Table S12). Furthermore, this *PHR*  
305 exhibited significant up-regulation in *mSPX* but showed no response to *PhoA* and  
306 *PhoD* mutations, indicating that it functions upstream of APs (Table S13). These  
307 results place PHR downstream of SPX and upstream of APs and PT genes.



308

### 309 **Broader metabolic pathways influenced by AP, SPX and P-stress**

310 We sequenced 36 RNA samples from 12 experimental conditions (Table S14) to  
311 understand what metabolic pathways are impacted by APs, P condition, and SPX. Data  
312 were subjected to weighted gene co-expression network analysis (WGCNA) (Fig. S8).  
313 One of the subnetworks composing 1622 differentially expressed genes (Table S15)  
314 showed strong linkages, and 82 of these genes exhibited particularly strong  
315 influences of mutations of *AP* and *SPX*. Of these, 76 genes displayed strong correlation  
316 with *SPX*, indicating a broad range of effectors of this regulator (Fig. 3a and Table  
317 S16).

318

319 Intact AP genes showed strong correlation with mutations of *AP* and *SPX* (Fig. 3a),  
320 further demonstrating compensatory regulation among APs. As part of the DOP  
321 utilization pathway, several ATP-binding cassette transporters also showed positive  
322 correlation with APs and *SPX* (Fig. 3a), which were remarkably up-regulated under  
323 G3P conditions (Fig. 3b). Furthermore, seven phospholipid metabolism-associated  
324 genes were up-regulated in *mPhoD* and *mSPX*, in which AP activity increased (mostly  
325 due to *PhoA*) regardless of P presence (Fig. 3b, c and Table S16). These suggest that  
326 alteration of the *PhoD-PhoA* balance and AP-PT regulation via the *SPX-PHR* cascade  
327 modulates phospholipid metabolism, a probable primary responder to P-nutrient  
328 dynamics.

329

330 The compounded impacts of AP, P, or *SPX*-dependent factors on metabolic pathways  
331 can be disentangled by comparing responses of the metabolic processes to the  
332 disruption of these genes and P supply. For example, most of the genes in the  
333 glycolysis/gluconeogenesis metabolism subnetwork were negatively correlated with  
334 AP activity (Table S16), but either be due to a negative influence of AP or a positive  
335 effect of P. However, pyruvate kinase gene, the key enzyme of glycolysis, and pyruvate  
336 dehydrogenase E2 component, the rate-limiting enzyme in the TCA cycle, were not  
337 repressed under P-deficiency as would be expected if they were under direct control



338 of P (Fig. 3b) but were up-regulated in *mPhoD/P-* and *mSPX/P-* (Fig. 3c). It appeared  
339 then, the functional loss of PhoD and SPX was the reason. Given that the mutations of  
340 these two genes resulted in up-regulation of intact APs (compensatory regulation  
341 shown above) (Fig. 1h, 2c), these results signal direct promoting roles of non-PhoD  
342 APs on glycolysis/gluconeogenesis. Even though further experimental verification is  
343 needed, such interrogation is meaningful for generating hypotheses.

344

345 By the same way of interrogation, our data show that P and APs by acting at different  
346 nodes have regulatory influences on various major metabolic pathways. In the  
347 photosynthesis pathway, photosystem II Psb27 protein was repressed by P stress  
348 (Fig. 3b) and up-regulated in *mPhoD/P+* and *mSPX/P+* (Fig. 3c), but showed no  
349 change in *mPhoA*, suggesting it is directly regulated by P rather than PhoA. A  
350 cytochrome c6 (*petJ*) was induced by P stress (Fig. 3b) and up-regulated in *mSPX* and  
351 *mPhoD* regardless of P condition, but not changed in *mPhoA*, suggesting the  
352 involvement of other APs. These results suggest that P and APs acting at different  
353 points of the pathway both have regulatory influences on photosynthesis.

354

355 A 3-oxoacyl-[acyl-carrier protein] reductase gene important in fatty acid metabolism,  
356 showed a positive correlation with P deficiency (Fig. 3b), consistent with the previous  
357 finding that fatty acid content increases under P stress (26, 27). It was down-  
358 regulated in *mPhoD/P+* and *mSPX/P+* groups (Fig. 3c), however, suggestive of a  
359 promoting roles of P deficiency in the metabolism. Meanwhile, transcription of a very  
360 long chain-fatty acids elongase (*ELOVL6*) gene was repressed under P stress (Fig. 3b)  
361 but up-regulated in *mPhoA/P-*, evidence that decreases in long-chain fatty acid  
362 content under P stress (28) might actually be due to the negative regulation by PhoA.  
363 Besides this, a mitochondrial carnitine/acylcarnitine transporter (*CACT*) was up-  
364 regulated in *mSPX/P+*, indicating that SPX can also affect fatty acid oxidation by  
365 controlling the transport of carnitine/acylcarnitine (Fig. 3c).

366

367 Glyoxylate and dicarboxylate metabolism connects the TCA cycle and various other  
368 metabolic pathways (29). Three genes in this metabolism are positively correlated

369 with AP activity (Fig. 3b) and up-regulated in *mPhoD* and *mSPX*, but down-regulated  
370 in *mPhoA*, indicating a dominant regulatory role of PhoA in glyoxylate/dicarboxylate  
371 metabolism. Similarly, four signaling pathway-related genes (Table S16) are  
372 positively correlated with AP activity (Fig. 3b) and showed up-regulation in *mPhoD*  
373 and *mSPX*, but no change in *mPhoA*. Thus, this P-related signaling pathway likely  
374 responds to P-stress through SPX and APs other than PhoA and PhoD.

375

376 We identified nine ammonium transporter genes, four of which were significantly  
377 down-regulated under P- conditions (Table S17), indicating P dependency (30) or AP  
378 dependency. The up-regulation of RHAG in *mSPX/P+* and *mPhoD/P+* relative to  
379 WT/P+ (Fig. 3c), however, supports AP (non-PhoD) dependency. Furthermore, an  
380 arginine repressor (ArgR) was induced by P stress (Fig. 3b) and up-regulated in  
381 *mPhoD/P+* and *mSPX/P+*, also indicating a positive influence of non-PhoD APs.  
382 Evidently, the SPX-PHR-APs (non-PhoD) regulatory cascade influences nitrogen-  
383 nutrient and arginine metabolism.

384

385 Iron is an essential, and often deficient, micronutrient for oceanic diatoms and other  
386 phytoplankton. Interestingly, three iron uptake-related genes (one ferritin and two  
387 ferric reductases) showed a positive correlation with P stress (Fig. 3b). Ferritin (*ftn*),  
388 which stores iron and releases it in a controlled fashion, was also up-regulated in  
389 *mPhoD* and *mSPX* (Fig. 3c). Similarly, *SPX* mutation promoted ferric reductase genes  
390 *FRE3* (Fig. 3c). By contrast, *PhoA* mutation caused no changes in expression of these  
391 genes, except under G3P treatment. These results suggest that SPX and non-PhoA  
392 non-PhoD APs act in concert in promoting iron uptake under P deficiency. Probably,  
393 a cross-talk between P and iron homeostases exists, as does in plants (31, 32), that is  
394 mediated by the SPX-PHR-AP mechanism.

395

396 Previous studies have shown that P deficiency halts phytoplankton cell division and  
397 population growth (33, 34). Accordingly, cell division cycle protein 20, DNA  
398 duplication licensing factor MCM3, and co-factor of the anaphase promoting complex  
399 in *P. tricornutum* were negatively correlated with AP activity (Fig. 3b). However, their

400 expression was up-regulated in *mPhoA* but down-regulated in *mPhoD* and *mSPX*  
401 regardless of P conditions, suggesting a direct role of PhoA.

402

### 403 **Discussion**

404 Although it is well recognized that phytoplankton have evolved a series of  
405 mechanisms, such as the AP enzyme system to scavenge DOP (28, 35, 36), how the  
406 redundant genes are coordinated and regulated in function to maintain P  
407 homeostasis under variable P conditions has remained unclear. Here we document in  
408 the model diatom *P. tricornutum* eight AP genes, six SPX genes, seven PHR genes, and  
409 thirteen PT genes. Through functional genetic manipulation, transcriptome profiling  
410 and physiological observations, we discover APs' intricate, functional differences and  
411 a central regulatory cascade of the P-stress response, depicting their influences on  
412 the general metabolic landscape (Fig. 4). These findings have important ecological  
413 implications regarding how varying P conditions can shape a phytoplankton  
414 assembly and how phytoplankton will respond or evolve to future ocean  
415 environments in the context of climate change in which P supply from deep ocean is  
416 predicted to decrease. The mutants generated here will be a valuable resource for  
417 future studies to further dissecting the molecular machinery underlying  
418 phytoplankton acclimation and adaptation to P variability (5, 37).

419

### 420 **SPX-PHR regulatory cascade of AP and DIP transporter expression**

421 Our present results and the literature converge at a central P regulatory cascade (Fig.  
422 4), which simplistically can be presented as SPX-PHR-PSI, where PSI (P starvation  
423 induced) represents AP and PT as well as P-responsive effectors not discussed in this  
424 paper, SPX is an inhibitory master regulator, and PHR is a secondary regulator that  
425 mediates regulating signals of SPX to modulate expression of PSI. These regulatory  
426 effects deeply influence many metabolic pathways through P-dependent or AP-  
427 dependent control circuits.

428

429 The SPX protein is known in plants as a regulator of P homeostasis and P signalling  
430 (38, 39). Its role in *P. tricornutum* as a master regulator of P acquisition and

431 homeostasis is demonstrated by multiple lines of evidence (Fig. 4). First, SPX  
432 mutation leads to significant up-regulation of AP and PT genes, even under P+  
433 conditions that would usually down-regulate these genes, indicating that SPX is an  
434 inhibitory up-stream regulator. Second, *SPX* transcription is responsive to P stress, as  
435 expected of a P regulator that senses internal P levels and controls its uptake (40, 41).  
436 Finally, WGCNA analysis reveals the dominant and broad metabolic influences of SPX.  
437

438 In plants, SPX functions through PHR, a positive regulator in P signaling (24, 40, 42).  
439 PHRs are transcription factors, harbouring myeloblastosis (MYB) and coiled-coil (CC)  
440 domains for DNA binding (43, 44). The response of the homologs in *P. tricornutum*  
441 WT to P stress and its lack of response in *mPhoA* and *mPhoD* places PHR as an  
442 intermediate between SPX and effectors. Furthermore, as recently reported, its  
443 knockout results in a significant decline of AP expression, demonstrating that PHR is  
444 a positive regulator (25). It is plausible then that under P+ conditions, SPX depresses  
445 PHR, thus maintaining low expression of AP and PT (Fig. 4). Under P stress, we find a  
446 greater increase in *PHR* than *SPX* expression, causing the PHR:SPX transcript ratio to  
447 increase from 1:9 under P+ to 1:4 under P- conditions (Table S18). As SPX  
448 presumably functions through binding to PHR (24), the relative increase of PHR may  
449 weaken the inhibitory signal of SPX, leading to elevated AP and PT expression (Fig. 4).  
450 This explains the observed counterintuitive up-regulation of SPX under P- conditions.  
451 To confirm this hypothesis, further study is warranted.

452

#### 453 **Functional differentiation and compensatory regulation of APs and PTs confers** 454 **versatility and flexibility in scavenging DOP**

455 Our comparative transcriptomic analyses reveal P-responsive and non-P-responsive  
456 APs, the latter likely functioning in regular metabolic pathways (Table S4). Similarly,  
457 PTs also diverge into high-affinity or low-affinity groups (Fig. S7). Among the P-  
458 responsive APs, our data clearly show that PhoA is an extracellular AP, verifying a  
459 previous report (35), usually accounting for ~75% of total AP activity, whereas PhoD  
460 is intracellular, accounting for <25%. More importantly, PhoA and PhoD show  
461 functional propensities towards different types of DOP substrates: when *P.*

462 *tricornutum* is provided G3P, PhoA hydrolyses G3P extracellularly to release  $\text{PO}_4^{3-}$  for  
463 uptake, but when phytate is the sole P source, it is imported for the intracellular PhoD  
464 to harvest. Such functional specialization between APs has previously not been  
465 documented, and hence should be investigated more broadly across phytoplankton  
466 phylogenetically tree. It is noteworthy that *P. tricornutum* utilizes phytate via AP,  
467 while other organisms do so via phytase (45, 46); our search of the *P. tricornutum*  
468 genome returned no phytase gene.

469

470 Our data further show that the functional differentiation between PhoA and PhoD is  
471 not static but strikingly dynamic. Although PhoA is usually responsible for G3P  
472 utilization, when it is functionally lost, the usually minor PhoD is transcriptionally up-  
473 regulated to maintain G3P utilization. Similarly, the disruption of *PhoD* induces  
474 elevation of *PhoA* expression. This is an intriguing combination of functional  
475 replacement and compensatory up-regulation of one AP for another.

476

477 These characteristics have significant ecological and evolutionary implications (Fig.  
478 1e). First, the functional differentiation and the ability to switch APs give the alga the  
479 flexibility to utilize different types of DOP available in the environment. Notably,  
480 utilization of phytate does not yield the same flexibility as G3P; when the primary  
481 responsible enzyme PhoD is lost, PhoA does not step up to enable phytate utilization.  
482 Second, the bidirectional compensatory expression scheme allows the phytoplankton  
483 to modulate expression levels of different APs for utilizing different concentrations  
484 and types of available DOPs. Conceivably, when PhoA is switched to PhoD as in the  
485 case of *PhoA* mutation, a transporter of the DOP substrate is needed. Hence, the higher  
486 efficiency of utilizing DOP is off set by the cost in synthesizing DOP transporter in the  
487 case of PhoD, and the benefit of hydrolysing DOP extracellularly without having to  
488 synthesise transporters is off set by losing part of the resulting  $\text{PO}_4^{3-}$  in the case of  
489 PhoA. It follows that some DOPs may be too costly to import, giving advantages to  
490 extracellular hydrolysis. Third, some DOPs such as TEP, not accessible to *P.*  
491 *tricornutum*, pose additional factors influencing phytoplankton community assembly  
492 by favoring species able to utilize these DOPs. Finally, the ability to switch between

493 different APs for using one DOP substrate may relax constraints for AP mutation,  
494 possibly the reason that AP sequences rapidly diverged (5).

495

#### 496 **Metabolic landscape influenced by APs and P and potential P-dependent iron** 497 **uptake**

498 The combination of gene knockouts and transcriptome profiling unveils remarkable  
499 influences of APs, SPX, and P conditions on the metabolic landscape (Fig. 4). This is  
500 more deeply demonstrated by our WGCNA analyses, which help disentangle  
501 compounded effects of P condition, AP, and other SPX-dependent factors. Data (Table  
502 S19) show that the SPX-PHR-AP cascade influences glyoxylate/dicarboxylate  
503 metabolism (involving PhoA) and ammonium uptake/arginine metabolism  
504 (involving non-PhoD); fatty acid biosynthesis is positively influenced by P deficiency  
505 while long-chain lipid synthesis is negatively regulated by PhoA; phospholipid  
506 metabolism is under the influence of PhoD-PhoA balance and AP-PT regulation;  
507 photosynthesis is regulated by P condition and some APs; glycolysis and TCA cycle  
508 are influenced by P stress or APs under the control of SPX at different nodes of the  
509 pathway; and SPX and non-PhoA, non-PhoD APs may be involved in regulating iron  
510 uptake under P-deficiency. These indicate that APs have dual functions, one in  
511 scavenging DOPs and the other in regulating metabolic processes under normal P  
512 conditions. It will be fruitful to further dissect the influences of AP and P condition on  
513 these metabolic pathways, particularly iron uptake, photosynthetic carbon fixation,  
514 and the cell cycle (governing intrinsic population growth) in phytoplankton.

515

#### 516 **Data availability**

517 Raw sequencing data is now available at NCBI in the SRA (Short Read Archive)  
518 database under accession number SRP214503.

519

#### 520 **Conflict of Interest**

521 The authors declare no conflict of interest.

522

#### 523 **Author contribution**

524 S. Lin conceived and supervised the work. Zhang, Zhou, S. Lin, Li, and X. Lin designed  
525 the experiments and data analysis strategies. Zhang, Wang, Li, Wu, and You carried  
526 out the experiments. Zhang and Zhou conducted data analyses. Zhang and S. Lin wrote  
527 the manuscript. All authors participated in revising the manuscript and agreed to the  
528 final submitted version.

529

### 530 **Acknowledgements**

531 We are indebted to Drs. Chris Bowler (IBENS, France) and Jacquine Niles (MIT, USA)  
532 for sharing experience in and providing suggestions on gene transformation or  
533 CRISPR/Cas9. We also thank Dr. Xin Lin (Xiao), a diatom epigenetics expert, for  
534 providing the plasmids and Ms. Chentao Guo for her logistic support. The work was  
535 financially supported by the Marine S & T Fund of Shandong Province for Pilot  
536 National Laboratory for Marine Science and Technology (Qingdao) (grant #  
537 2018SDKJ0406-3) and Natural Science Foundation of China (grant #41776116). The  
538 Marine Microbial Initiative (MMI) of the Gordon and Betty Moore Foundation  
539 provided funding toward developing protist functional tool (grant #GBMF grant  
540 #4980.01) that enabled S. Lin to develop this work.

541

### 542 **References**

- 543 1. Falkowski PG, Barber RT, Smetacek VV. Biogeochemical Controls and  
544 Feedbacks on Ocean Primary Production. *Science*. 1998;281(5374):200-7.
- 545 2. Dusastre V. Growth in the fast lane. *Nature*. 2000;406(6791):31-.
- 546 3. Wu J. Phosphate Depletion in the Western North Atlantic Ocean. *Science*.  
547 2000;289(5480):759-62.
- 548 4. Thingstad TF, Krom MD, Mantoura RF, Flaten GA, Groom S, Herut B, et al.  
549 Nature of phosphorus limitation in the ultraoligotrophic eastern Mediterranean.  
550 *Science*. 2005;309(5737):1068-71.
- 551 5. Lin S, Litaker RW, Sunda WG. Phosphorus physiological ecology and molecular  
552 mechanisms in marine phytoplankton. *J Phycol*. 2016;52(1):10-36.
- 553 6. Karl DM. Microbially mediated transformations of phosphorus in the sea: new  
554 views of an old cycle. *Ann Rev Mar Sci*. 2014;6:279-337.



- 555 7. Kolowitz LC, Ingall ED, Benner R. Composition and cycling of marine organic  
556 phosphorus. *Limnology and Oceanography*. 2001;46(2):309-20.
- 557 8. Secco D, Wang C, Arpat BA, Wang Z, Poirier Y, Tyerman SD, et al. The emerging  
558 importance of the SPX domain-containing proteins in phosphate homeostasis. *New*  
559 *Phytol*. 2012;193(4):842-51.
- 560 9. Rastogi A, Murik O, Bowler C, Tirichine L. PhytoCRISP-Ex: a web-based and  
561 stand-alone application to find specific target sequences for CRISPR/CAS editing.  
562 *BMC Bioinformatics*. 2016;17(1):261.
- 563 10. Nymark M, Sharma A, Hafskjold M, Sparstad T, Bones A, Winge P. CRISPR/Cas9  
564 Gene Editing in the Marine Diatom *Phaeodactylum tricornutum*. *Bio-Protocol*.  
565 2017;7(15).
- 566 11. Nymark M, Sharma AK, Sparstad T, Bones AM, Winge P. A CRISPR/Cas9 system  
567 adapted for gene editing in marine algae. *Sci Rep*. 2016;6:24951.
- 568 12. Daboussi F, Leduc S, Marechal A, Dubois G, Guyot V, Perez-Michaut C, et al.  
569 Genome engineering empowers the diatom *Phaeodactylum tricornutum* for  
570 biotechnology. *Nat Commun*. 2014;5:3831.
- 571 13. Karl DM, Tien G. MAGIC: A sensitive and precise method for measuring  
572 dissolved phosphorus in aquatic environments. *Limnology and Oceanography*.  
573 1992;37(1):105-16.
- 574 14. Lin X, Zhang H, Huang B, Lin S. Alkaline Phosphatase Gene Sequence And  
575 Transcriptional Regulation By Phosphate Limitation In *Amphidinium Carterae*  
576 (Dinophyceae)(1). *J Phycol*. 2011;47(5):1110-20.
- 577 15. Shi X, Li L, Guo C, Lin X, Li M, Lin S. Rhodopsin gene expression regulated by  
578 the light dark cycle, light spectrum and light intensity in the dinoflagellate  
579 *Prorocentrum*. *Front Microbiol*. 2015;6:555.
- 580 16. Edgar RC. MUSCLE: multiple sequence alignment with high accuracy and high  
581 throughput. *Nucleic Acids Res*. 2004;32(5):1792-7.
- 582 17. Kumar S, Stecher G, Li M, Knyaz C, Tamura K. MEGA X: Molecular Evolutionary  
583 Genetics Analysis across Computing Platforms. *Molecular Biology and Evolution*.  
584 2018;35(6):1547-9.

- 585 18. Guindon S, Dufayard JF, Lefort V, Anisimova M, Hordijk W, Gascuel O. New  
586 algorithms and methods to estimate maximum-likelihood phylogenies: assessing the  
587 performance of PhyML 3.0. *Syst Biol.* 2010;59(3):307-21.
- 588 19. Gouy M, Guindon S, Gascuel O. SeaView version 4: A multiplatform graphical  
589 user interface for sequence alignment and phylogenetic tree building. *Mol Biol Evol.*  
590 2010;27(2):221-4.
- 591 20. Pertea M, Kim D, Pertea GM, Leek JT, Salzberg SL. Transcript-level expression  
592 analysis of RNA-seq experiments with HISAT, StringTie and Ballgown. *Nat Protoc.*  
593 2016;11(9):1650-67.
- 594 21. Love MI, Huber W, Anders S. Moderated estimation of fold change and  
595 dispersion for RNA-seq data with DESeq2. *Genome Biol.* 2014;15(12):550.
- 596 22. Langfelder P, Horvath S. WGCNA: an R package for weighted correlation  
597 network analysis. *BMC Bioinformatics.* 2008;9(1):559.
- 598 23. Shannon P, Markiel A, Ozier O, Baliga NS, Wang JT, Ramage D, et al. Cytoscape:  
599 a software environment for integrated models of biomolecular interaction networks.  
600 *Genome Res.* 2003;13(11):2498-504.
- 601 24. Puga MI, Mateos I, Charukesi R, Wang Z, Franco-Zorrilla JM, de Lorenzo L, et al.  
602 SPX1 is a phosphate-dependent inhibitor of Phosphate Starvation Response 1 in  
603 *Arabidopsis*. *Proc Natl Acad Sci U S A.* 2014;111(41):14947-52.
- 604 25. Kumar Sharma A, Muhloth A, Jouhet J, Marechal E, Alipanah L, Kissen R, et al.  
605 The Myb-like transcription factor phosphorus starvation response (PtPSR) controls  
606 conditional P acquisition and remodelling in marine microalgae. *New Phytol.* 2019.
- 607 26. Siron R, Giusti G, Berland B. Changes in the fatty acid composition of  
608 *Phaeodactylum tricornutum* and *Dunaliella tertiolecta* during growth and under  
609 phosphorus deficiency. *Marine Ecology Progress Series.* 1989;55:95-100.
- 610 27. Gong Y, Guo X, Wan X, Liang Z, Jiang M. Triacylglycerol accumulation and  
611 change in fatty acid content of four marine oleaginous microalgae under nutrient  
612 limitation and at different culture ages. *J Basic Microbiol.* 2013;53(1):29-36.
- 613 28. Yang ZK, Zheng JW, Niu YF, Yang WD, Liu JS, Li HY. Systems-level analysis of  
614 the metabolic responses of the diatom *Phaeodactylum tricornutum* to phosphorus  
615 stress. *Environ Microbiol.* 2014;16(6):1793-807.

- 616 29. Springsteen G, Yerabolu JR, Nelson J, Rhea CJ, Krishnamurthy R. Linked cycles  
617 of oxidative decarboxylation of glyoxylate as protometabolic analogs of the citric acid  
618 cycle. *Nat Commun.* 2018;9(1):91.
- 619 30. Alipanah L, Winge P, Rohloff J, Najafi J, Brembu T, Bones AM. Molecular  
620 adaptations to phosphorus deprivation and comparison with nitrogen deprivation  
621 responses in the diatom *Phaeodactylum tricornutum*. *PLoS One.*  
622 2018;13(2):e0193335.
- 623 31. Xie X, Hu W, Fan X, Chen H, Tang M. Interactions Between Phosphorus, Zinc,  
624 and Iron Homeostasis in Nonmycorrhizal and Mycorrhizal Plants. *Front Plant Sci.*  
625 2019;10:1172.
- 626 32. Yong SC, Roversi P, Lillington J, Rodriguez F, Krehenbrink M, Zeldin OB, et al.  
627 A complex iron-calcium cofactor catalyzing phosphotransfer chemistry. *Science.*  
628 2014;345(6201):1170-3.
- 629 33. Li M, Shi X, Guo C, Lin S. Phosphorus Deficiency Inhibits Cell Division But Not  
630 Growth in the Dinoflagellate *Amphidinium carterae*. *Front Microbiol.* 2016;7:826.
- 631 34. Shi X, Lin X, Li L, Li M, Palenik B, Lin S. Transcriptomic and microRNAomic  
632 profiling reveals multi-faceted mechanisms to cope with phosphate stress in a  
633 dinoflagellate. *ISME J.* 2017;11(10):2209-18.
- 634 35. Lin HY, Shih CY, Liu HC, Chang J, Chen YL, Chen YR, et al. Identification and  
635 characterization of an extracellular alkaline phosphatase in the marine diatom  
636 *Phaeodactylum tricornutum*. *Mar Biotechnol (NY).* 2013;15(4):425-36.
- 637 36. Lin X, Wang L, Shi X, Lin S. Rapidly diverging evolution of an atypical alkaline  
638 phosphatase (PhoA(aty)) in marine phytoplankton: insights from dinoflagellate  
639 alkaline phosphatases. *Front Microbiol.* 2015;6:868.
- 640 37. Caceres C, Spatharis S, Kaiserli E, Smeti E, Flowers H, Bonachela JA. Temporal  
641 phosphate gradients reveal diverse acclimation responses in phytoplankton  
642 phosphate uptake. *ISME J.* 2019;13(11):2834-45.
- 643 38. Duan K, Yi K, Dang L, Huang H, Wu W, Wu P. Characterization of a sub-family  
644 of *Arabidopsis* genes with the SPX domain reveals their diverse functions in plant  
645 tolerance to phosphorus starvation. *Plant J.* 2008;54(6):965-75.

- 646 39. Du H, Yang C, Ding G, Shi L, Xu F. Genome-Wide Identification and  
647 Characterization of SPX Domain-Containing Members and Their Responses to  
648 Phosphate Deficiency in *Brassica napus*. *Front Plant Sci.* 2017;8:35.
- 649 40. Lv Q, Zhong Y, Wang Y, Wang Z, Zhang L, Shi J, et al. SPX4 Negatively Regulates  
650 Phosphate Signaling and Homeostasis through Its Interaction with PHR2 in Rice.  
651 *Plant Cell.* 2014;26(4):1586-97.
- 652 41. Liu F, Wang Z, Ren H, Shen C, Li Y, Ling HQ, et al. OsSPX1 suppresses the  
653 function of OsPHR2 in the regulation of expression of OsPT2 and phosphate  
654 homeostasis in shoots of rice. *Plant J.* 2010;62(3):508-17.
- 655 42. Wang Z, Ruan W, Shi J, Zhang L, Xiang D, Yang C, et al. Rice SPX1 and SPX2  
656 inhibit phosphate starvation responses through interacting with PHR2 in a  
657 phosphate-dependent manner. *Proc Natl Acad Sci U S A.* 2014;111(41):14953-8.
- 658 43. Bustos R, Castrillo G, Linhares F, Puga MI, Rubio V, Perez-Perez J, et al. A central  
659 regulatory system largely controls transcriptional activation and repression  
660 responses to phosphate starvation in *Arabidopsis*. *PLoS Genet.* 2010;6(9):e1001102.
- 661 44. Rubio V, Linhares F, Solano R, Martin AC, Iglesias J, Leyva A, et al. A conserved  
662 MYB transcription factor involved in phosphate starvation signaling both in vascular  
663 plants and in unicellular algae. *Genes Dev.* 2001;15(16):2122-33.
- 664 45. Rao DE, Rao KV, Reddy TP, Reddy VD. Molecular characterization,  
665 physicochemical properties, known and potential applications of phytases: An  
666 overview. *Crit Rev Biotechnol.* 2009;29(2):182-98.
- 667 46. Georgianna DR, Hannon MJ, Marcuschi M, Wu S, Botsch K, Lewis AJ, et al.  
668 Production of recombinant enzymes in the marine alga *Dunaliella tertiolecta*. *Algal*  
669 *Research.* 2013;2(1):2-9.
- 670
- 671

672 **Figure legends**

673

674 **Fig. 1. DOP utilization under the coordinated functions of different APs and the**  
675 **compensatory responses between PhoA and PhoD. a** DIP concentration in the  
676 medium and cell growth under different P conditions. Size of the circle and the  
677 number of the plus sign corresponds to DIP concentration detected in the medium  
678 and the growth rate. The minus sign shows no DIP release in the medium and no cell  
679 growth. NT, not tested. **b-c** DIP concentration in the culture. P+, P-replete culture; P-,  
680 P-depleted culture; G3P, glycerol-3-phosphate; PA, phytate; TEP, triethyl phosphate.  
681 Each data point is the mean of triplicate cultures with the error bar indicating  
682 standard deviation. **d** Heatmap of cell growth under different P conditions. The scale  
683 on the right represents cell concentration as  $\times 10^6$  cells mL<sup>-1</sup>. P- Controls depicts the  
684 low growth of P-deprived mutants and WT cultures. **e** Model of DOP utilization in *P.*  
685 *tricornutum*. G3P can be hydrolysed to release DIP by the secreted PhoA or be  
686 imported into cells and utilized via the intracellular PhoD. PA only can be utilized by  
687 the intracellular PhoD and TEP cannot be utilized. **f** Relative expression of AP genes  
688 in *mPhoA* cultures under G3P condition determined by RNA-seq. **g** Relative  
689 expression of AP genes in *mPhoA* under G3P condition determined using RT-qPCR.  
690 Asterisk depicts significant difference. **h** Relative expression of AP genes in *mPhoD*  
691 determined by RNA-seq. **i** Relative expression of AP genes in *mPhoD* determined by  
692 RT-qPCR. Asterisk shows significant difference.

693

694 **Fig. 2. Evidence that SPX is upstream negative regulator of AP and P**  
695 **transporters. a** Total AP activities in *mSPX* strains. **b** Extracellular AP activities in  
696 *mSPX* strains. **c** The significantly up-regulated AP and PT genes determined by RNA-  
697 seq in *mSPX* under P+ and P- conditions. **d** The relative expression of AP genes in  
698 *mSPX* determined by RT-qPCR. **e** The relative expression PT genes in *mSPX*  
699 determined by RT-qPCR. **f** The model of SPX as an upstream negative regulator in *P.*  
700 *tricornutum*. Positive and negative effects are indicated by arrows and flat-ended  
701 lines, respectively. Asterisk depicts significant difference.

702

703 **Fig. 3. Weight gene co-expression network analysis (WGCNA) and cluster heat**  
704 **map. a** The network of the 82 most highly connected genes. Several metabolic  
705 processes, including phospholipid metabolism and parts of photosynthesis are  
706 regulated by P deficiency. The network only displays the first neighbor of the three  
707 mutated genes where the corresponding topological overlap is above the threshold  
708 of 0.05. Red dots depict positive correlations with AP activity; blue dots depict  
709 negative correlations with AP activity. Genes to be elaborated in the main text are  
710 shown with abbreviated names. **b** Expression profiles of the 82 core genes classified  
711 in the mutant transcriptomes under different P conditions. **c** Comparison between  
712 mutant and wild-type groups under different P conditions. The scale on the right  
713 represents log<sub>2</sub> transformed gene expression fold changes.

714

715 **Fig. 4. Draft P metabolic atlas in the model diatom under P+ and P- conditions.**  
716 **Underlined and italicized are various metabolic processes.** The P+ condition is  
717 shown in the inset (lower left), while the main figure depicts P- condition. Positive  
718 and negative regulations are indicated by arrows and flat-ended lines, respectively.  
719 Vertical red arrows indicate up- and down-regulations, respectively.

**A**

|       | DIP in medium |     |    |     | Growth |     |    |     |
|-------|---------------|-----|----|-----|--------|-----|----|-----|
|       | DIP           | G3P | PA | TEP | DIP    | G3P | PA | TEP |
| WT    | ++            | +   | -  | -   | +++    | +++ | ++ | -   |
| mPhoA | ++            | -   | -  | -   | +++    | +++ | ++ | -   |
| mPhoD | ++            | NT  | -  | -   | +++    | NT  | +  | -   |

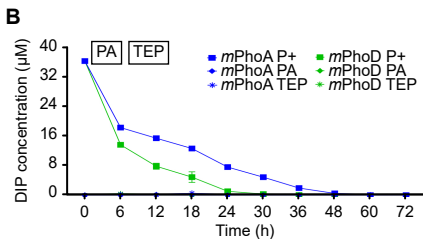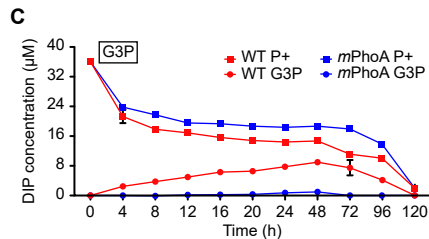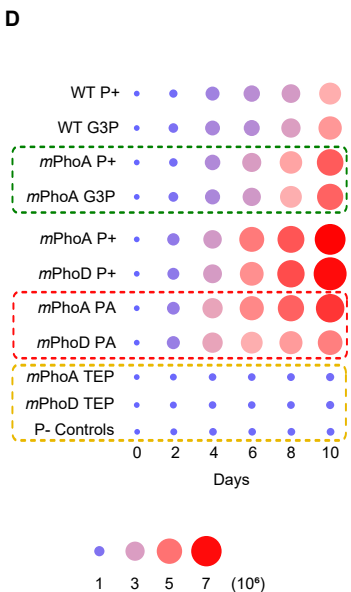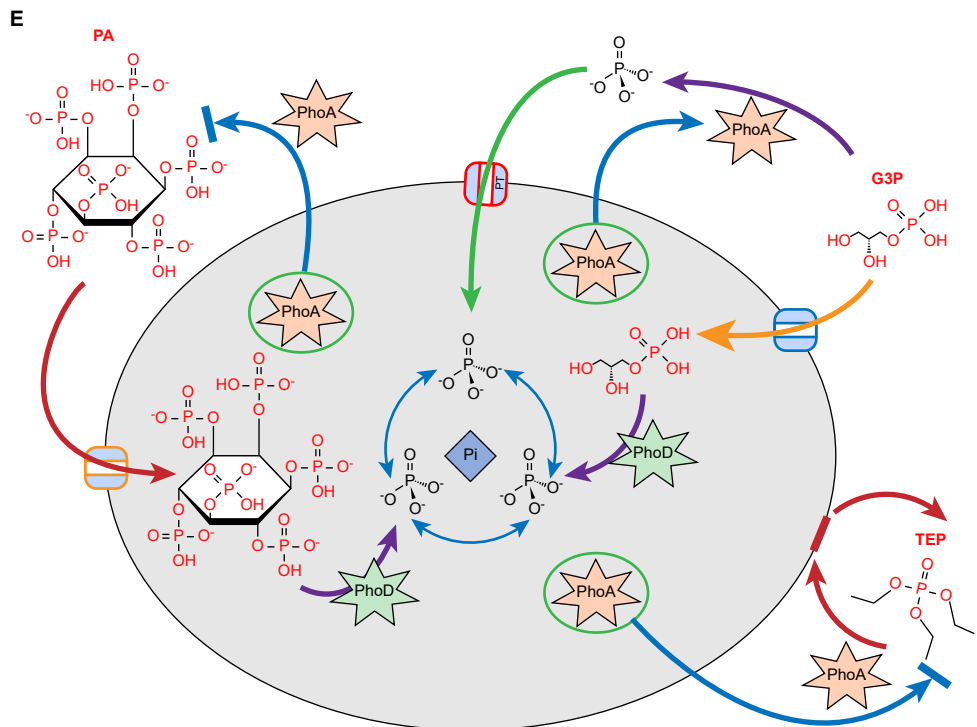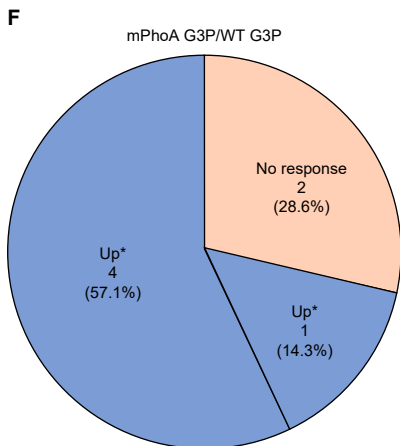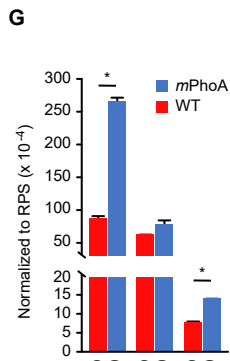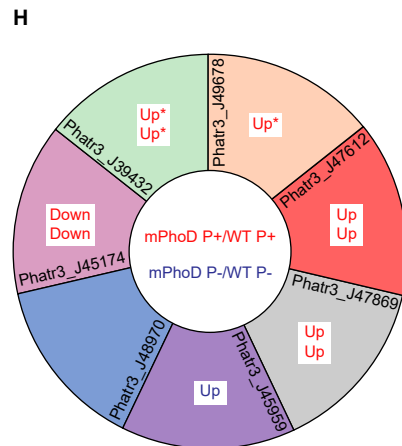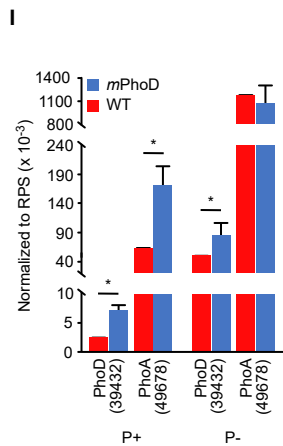



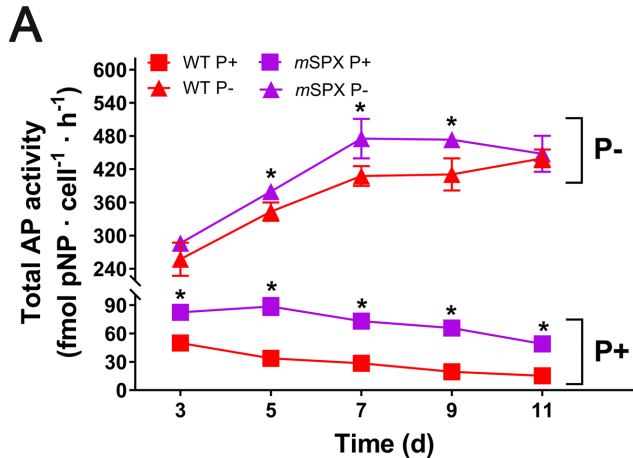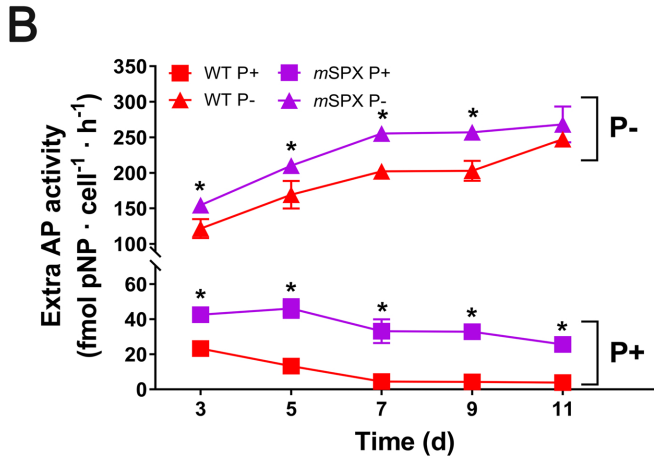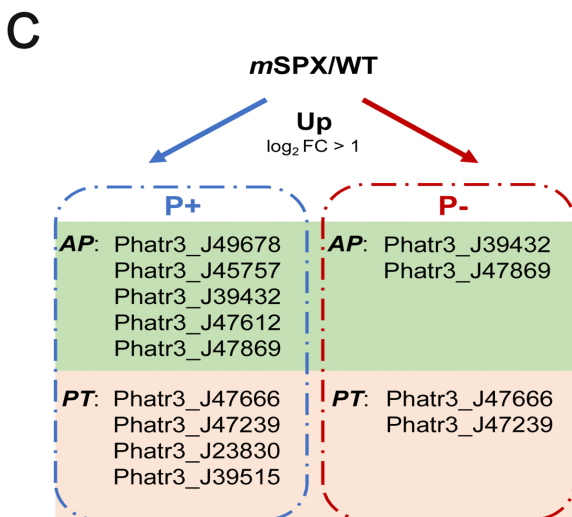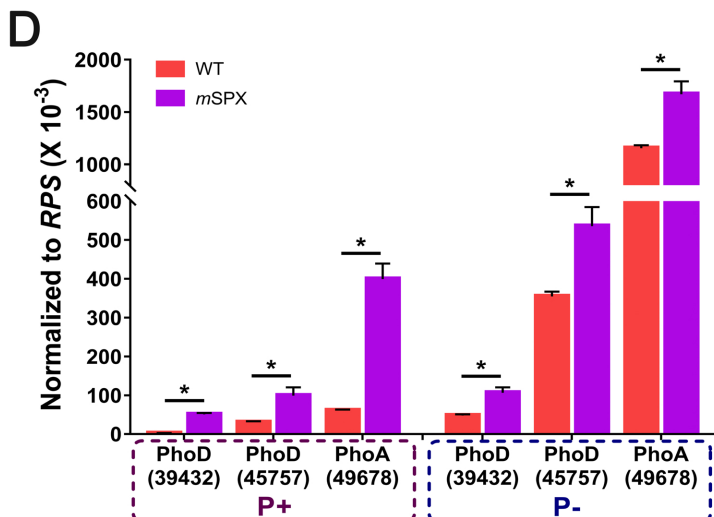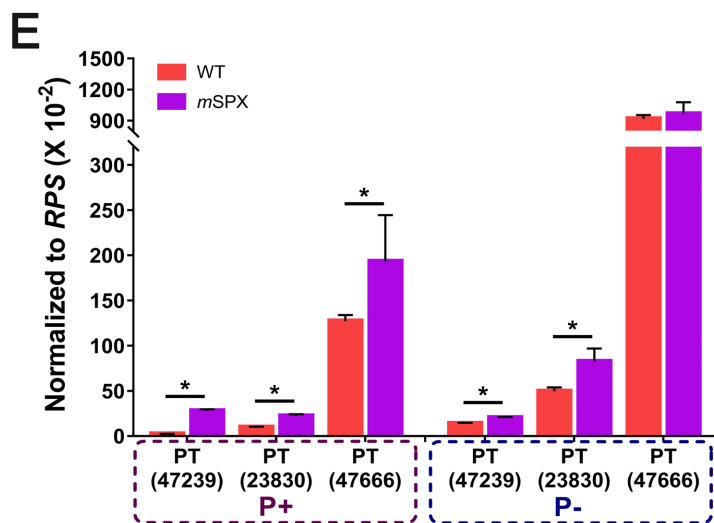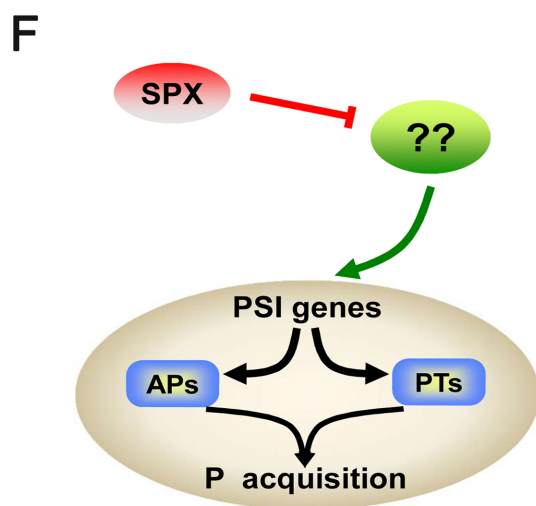

**A**

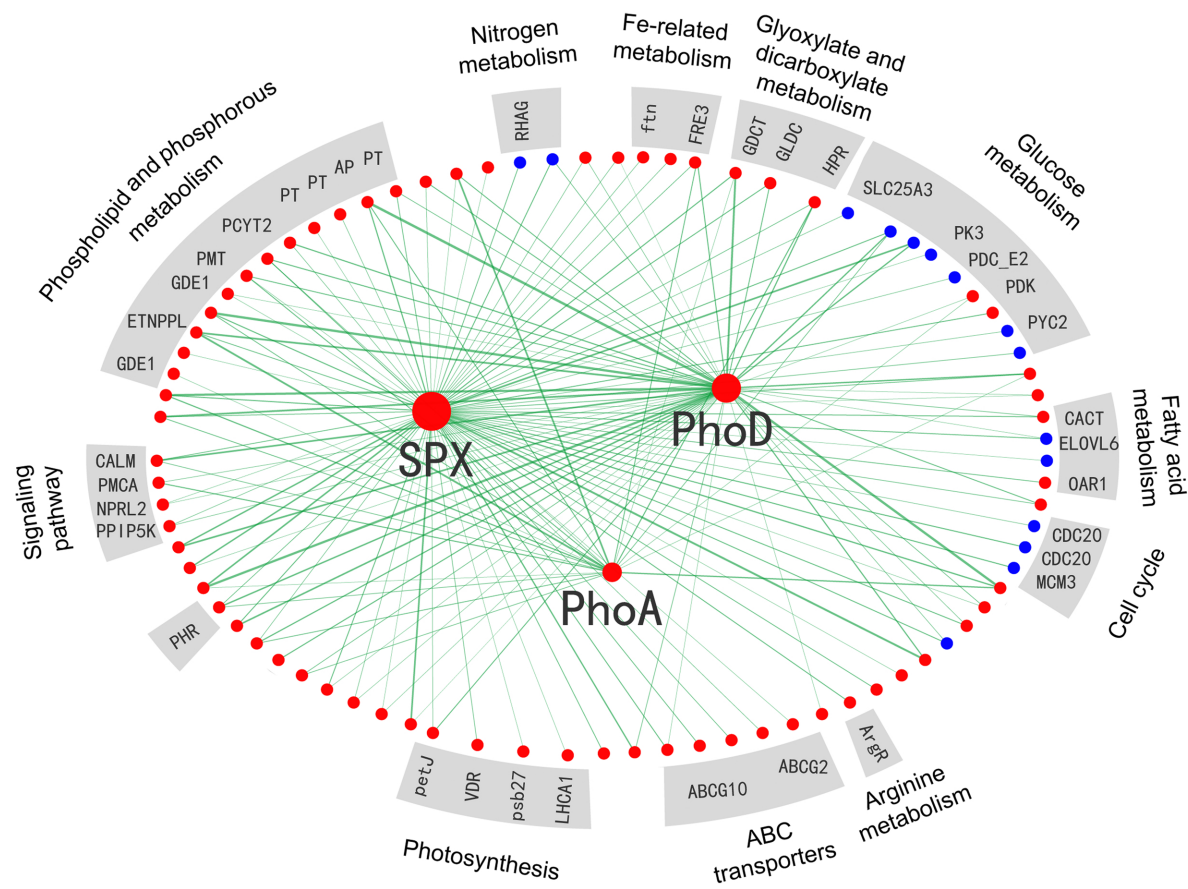

**C**

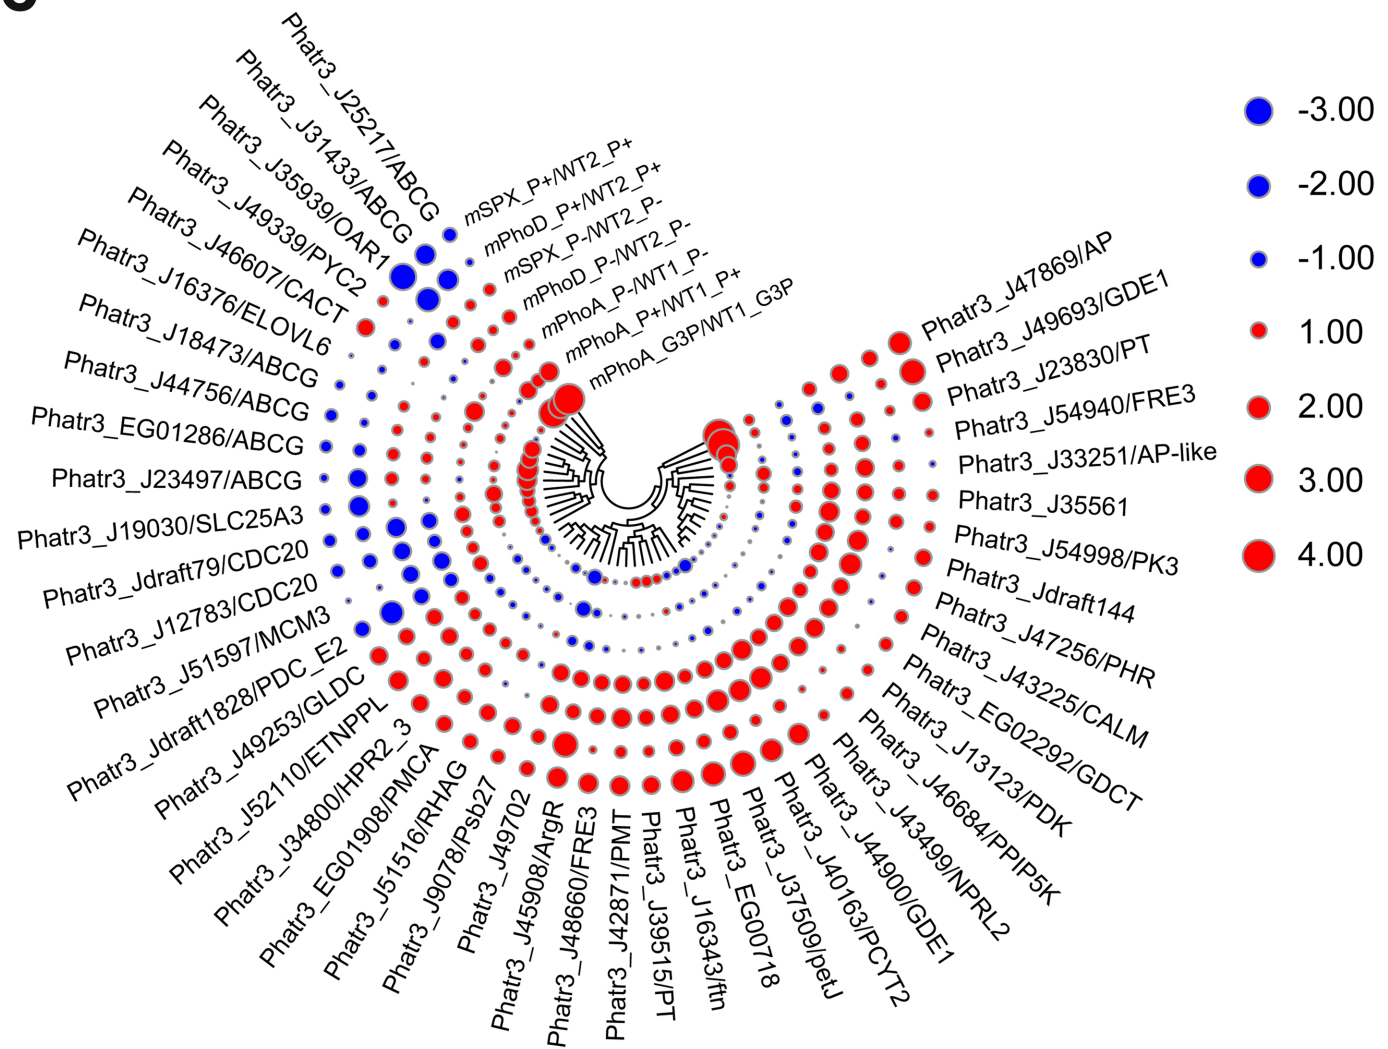

**B**

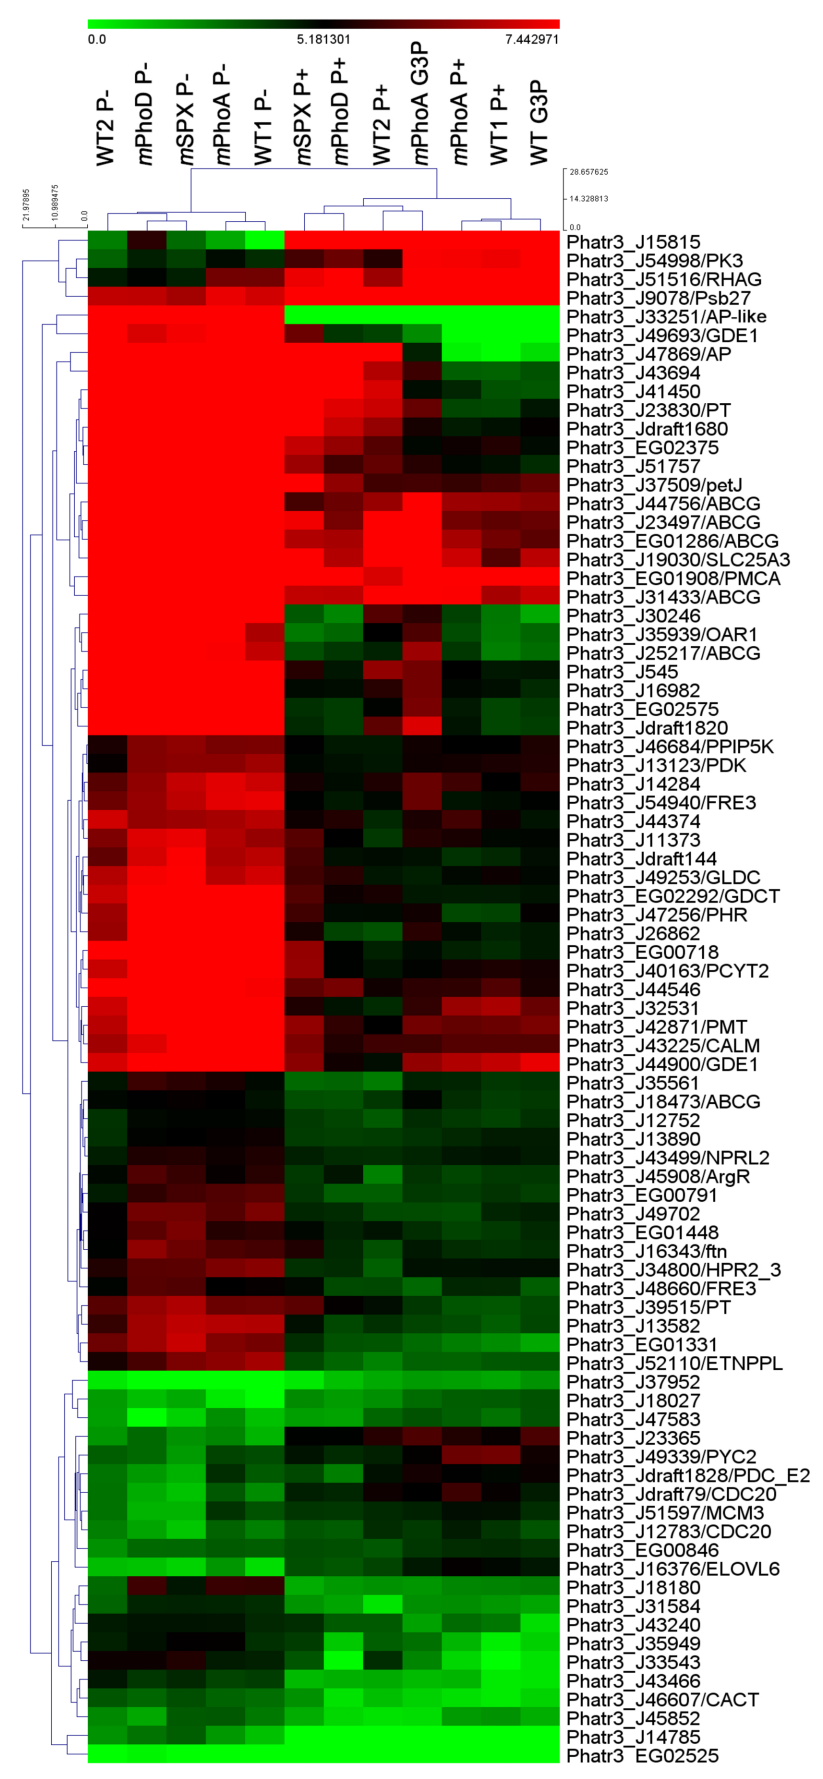

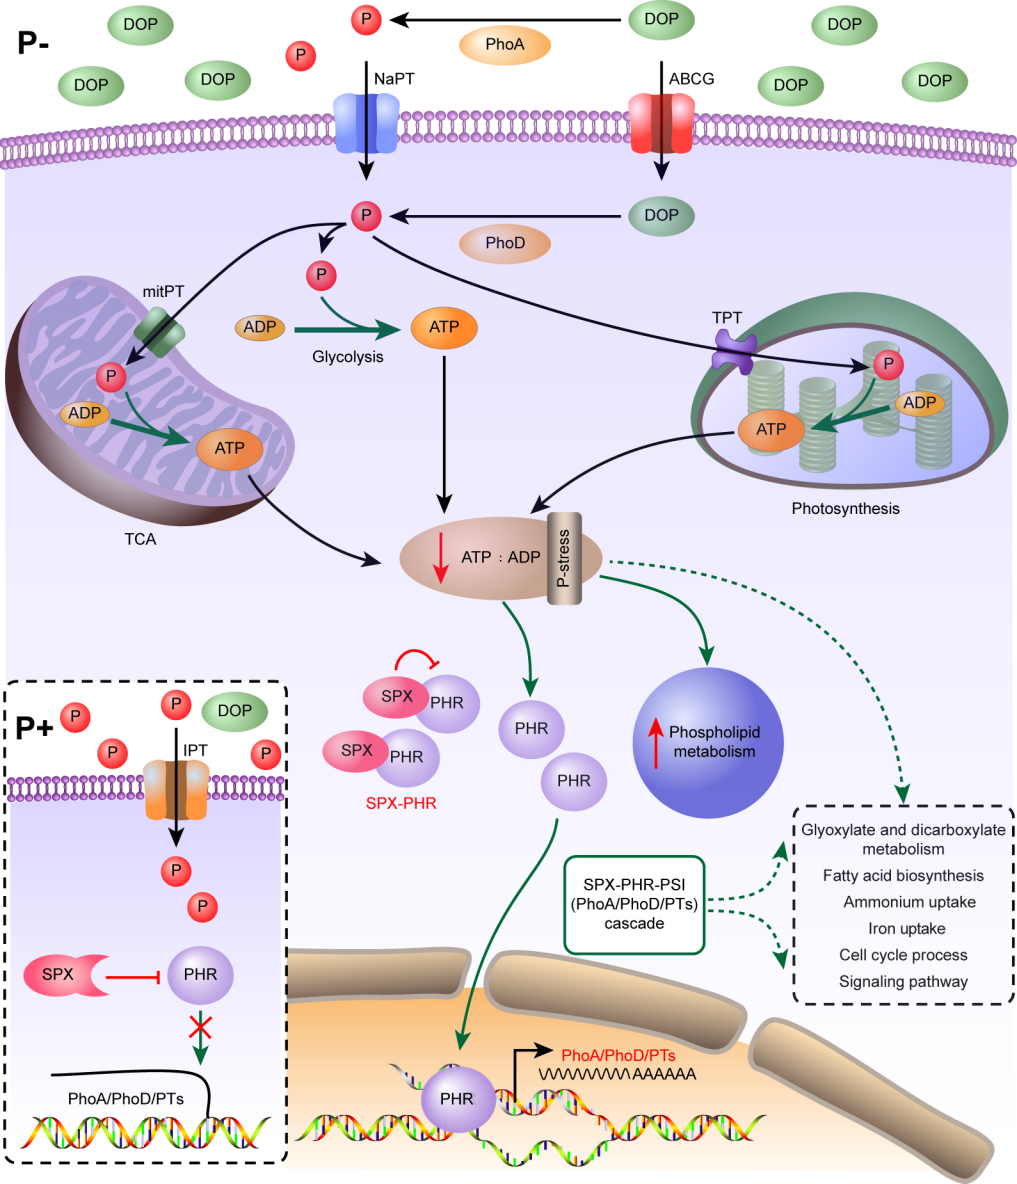

Source: https://www.biorxiv.org/content/10.1101/2020.05.20.107318v1.full.pdf
